# Supplementary material for: Cationic aza-macrocyclic complexes of germanium(ii) and silicon(iv)
Source: Royal Society of Chemistry journal article supplement (doi:10.1039/c5dt03941j), 2015-01-01
Supplement: c5dt03941j1.pdf [file c5dt03941j1.pdf]

ESI

for

## Cationic Aza-macrocyclic Complexes of Germanium(II) and Silicon(IV)

Matthew Everett, Andrew Jolleys, William Levason, Mark E. Light, David Pugh and Gillian

Reid

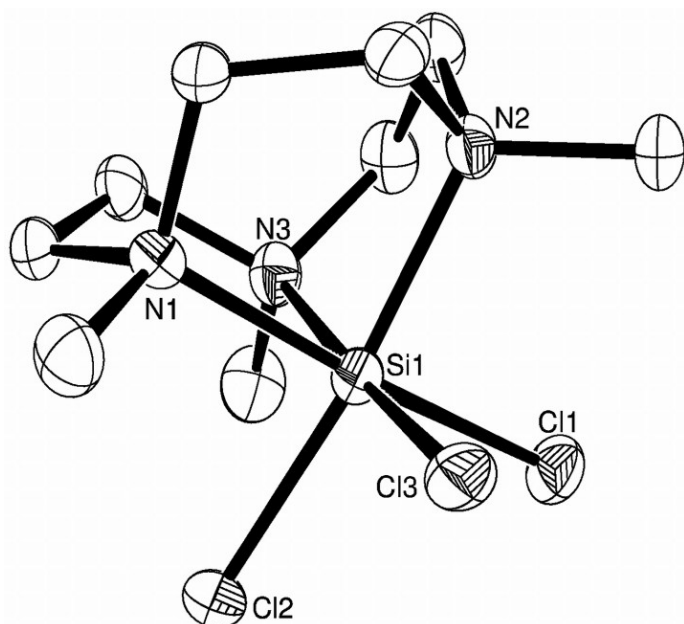

Figure S1. The cation of  $[\text{SiCl}_3(\text{Me}_3\text{tacn})]\text{Cl}$ , showing one of the three symmetry-independent cations in the asymmetric unit. Thermal ellipsoids at the 50% probability, hydrogen atoms, solvent ( $\text{CH}_2\text{Cl}_2$ ), and non-coordinating chloride anion omitted for clarity. Selected ranges of bond lengths ( $\text{\AA}$ ) and angles ( $^\circ$ ): Si–Cl 2.142(2)–2.171(2), Si–N 2.023(6)–2.035(6); N–Si–N 84.0(2)–85.0(2), Cl–Si–Cl 92.1(1)–93.42(9), N–Si–Cl (*cis*) 89.7(2)–92.7(2).
